# Supplementary figures and images for: Enantiopure and racemic radical-cation salts of B(malate)2− anions with BEDT-TTF
Source: Royal Society of Chemistry journal article supplement (doi:10.1039/c6dt01038e), 2016-01-01

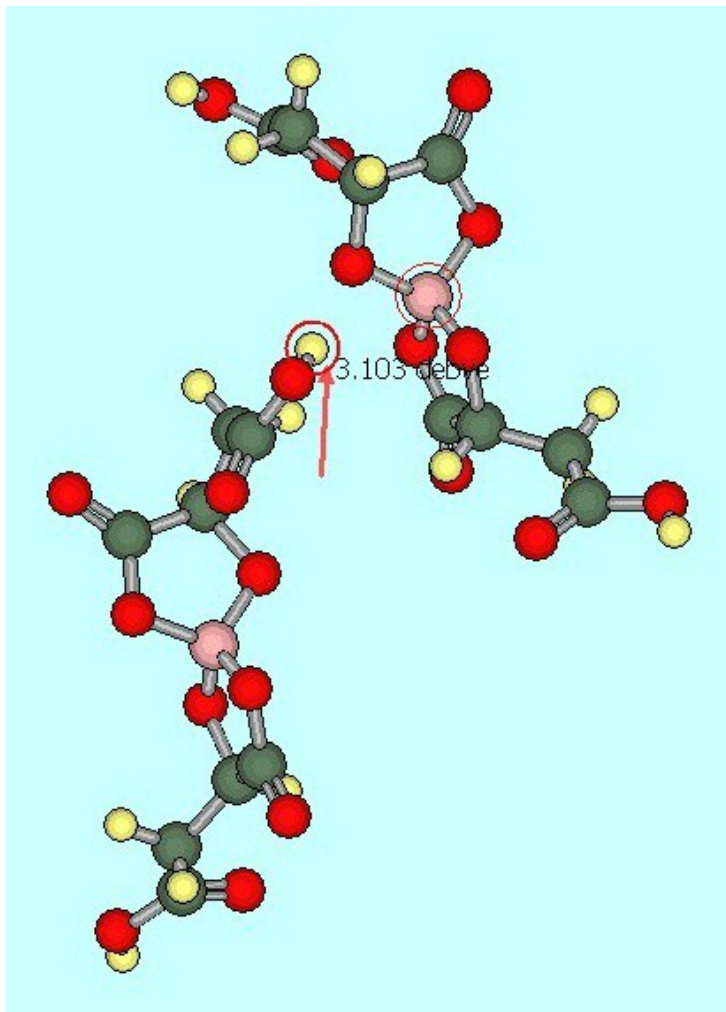

Supplement: c6dt01038e3.pdf [file c6dt01038e3.pdf]
